# Supplementary material
Source: Royal Society of Chemistry journal article supplement (doi:10.1039/d6cp01425a)
Supplement: d6cp01425a1.xlsx [file d6cp01425a1.xlsx]

## Sheet: Sheet1
No	Name	CAS no	A_tot	M_1	M_2	M_1 HBD	M_1 HBA
1	methane	74-82-8	56.0074	-0.00059495	0.000239217	0	0
2	ethane	74-84-0	77.5593	-0.00158944	0.000230428	0	0
3	propane	74-98-6	97.6258	-0.00329076	0.000330846	0	0
4	butane	106-97-8	117.343	-0.00378703	0.000381518	0	0
5	pentane	109-66-0	137.254	-0.00442148	0.000430855	0	0
6	heptane	142-82-5	176.934	-0.00571666	0.000528867	0	0
7	octane	111-65-9	197.028	-0.00613587	0.000576492	0	0
8	decane	124-18-5	236.937	-0.0072789	0.000677425	0	0
9	undecane	1120-21-4	256.733	-0.00790691	0.000723962	0	0
10	dodecane	112-40-3	276.658	-0.00867581	0.000773612	0	0
11	tetradecane	629-59-4	316.998	-0.00989697	0.000867428	0	0
12	pentadecane	629-62-9	336.694	-0.0104203	0.000916493	0	0
13	hexadecane	544-76-3	356.865	-0.0105803	0.000965935	0	0
14	heptadecane	629-78-7	376.579	-0.011832	0.00100655	0	0
15	octadecane	593-45-3	396.266	-0.0121476	0.00106778	0	0
16	eicosane	112-95-8	436.54	-0.013193	0.00117316	0	0
17	tetracosane	646-31-1	515.399	-0.0158454	0.00135484	0	0
18	2-methylpentane	107-83-5	153.2	-0.00510157	0.000520663	0	0
19	3-methylpentane	96-14-0	151.002	-0.00497819	0.000508455	0	0
20	2,3-dimethylbutane	79-29-8	147.347	-0.00439381	0.00054989	0	0
21	2,2-dimethylbutane	75-83-2	146.27	-0.0049025	0.000580421	0	0
22	cyclopentane	287-92-3	120.005	-0.00357932	0.000368542	0	0
23	cyclohexane	110-82-7	134.552	-0.00406044	0.000357219	0	0
24	cycloheptane	291-64-5	148.932	-0.00313875	0.000330495	0	0
25	ethanol	64-17-5	88.4066	-0.00275245	0.00360103	0.0499462	0.0222344
26	1-propanol	71-23-8	108.388	-0.00341875	0.00361476	0.0499497	0.0221715
27	1-butanol	71-36-3	128.117	-0.00362186	0.00366742	0.0502918	0.0218498
28	2-pentanol	6032-29-7	144.902	-0.00372546	0.00339165	0.0495661	0.0136117
29	3-pentanol	584-02-1	143.776	-0.0034842	0.00306821	0.0405085	0.0131207
30	1-pentanol	71-41-0	148.249	-0.0046127	0.00370876	0.0503182	0.0220525
31	1-hexanol	111-27-3	167.761	-0.00479615	0.00375971	0.0503429	0.0218464
32	1-octanol	111-87-5	207.605	-0.00606344	0.00385914	0.0504216	0.0218106
33	glycerol	56-81-5	124.785	-0.00111114	0.00764515	0.0915361	0.0438784
34	benzene	71-43-2	121.92	-0.00274397	0.00234534	0	0
35	toluene	108-88-3	140.91	-0.00322635	0.00229411	0	0
36	o-terphenyl	84-15-1	268.313	-0.00426703	0.00467879	0	0
37	acetone	67-64-1	102.645	-0.00105095	0.00366815	0.0524656	0
38	water	7732-18-5	43.2693	-0.00398563	0.00522101	0.0645603	0.0607772
39	tetrahydrofuran	109-99-9	112.62	-0.00261615	0.00243864	0.0414271	0
40	ethylene	74-85-1	72.3822	-0.00135694	0.00129137	0.00075724	0
41	carbon disulfide	75-15-0	99.6026	-0.000931644	0.000458155	0	0
42	1,2-dichloroethane	107-06-2	117.48	0.00261781	0.00278796	0	0.00125019
43	acetonitrile	75-05-8	83.0718	-0.00110164	0.00439848	0.0404137	0.0043476
44	ammonia	7664-41-7	48.9958	-0.00208021	0.00410434	0.0700605	0.00818349
45	2-propanol	67-63-0	107.2	-0.00263122	0.00358525	0.050695	0.0207634
46	methanol	67-56-1	67.9016	-0.00275889	0.00366252	0.0478106	0.028358
47	tridecane	629-50-5	296.873	-0.00961292	0.000822284	0	0
48	nonane	111-84-2	216.93	-0.00688545	0.000626905	0	0
49	hexane	110-54-3	157.188	-0.0049589	0.000479826	0	0
50	isopentane	78-78-4	133.444	-0.00414451	0.000470302	0	0
51	bromoform	75-25-2	132.603	0.0013886	0.00225773	0	0.0208643
52	N,N-dimethylacetamide	127-19-5	133.104	-0.00242639	0.00465282	0.0871642	0
53	dimethyl ether	115-10-6	89.3003	-0.0019286	0.0021124	0.0302727	0
54	diiodomethane	75-11-6	125.392	0.000931888	0.00265088	0	0.0128898
55	dichloromethane	75-09-2	98.3842	0.000846335	0.00241828	0	0.0152154
56	chloroform	67-66-3	117.444	0.00155506	0.00193968	0	0.0229365
57	carbon tetrachloride	56-23-5	133.669	0.000856811	0.000940313	0	0
58	chlorotrifluoromethane	75-72-9	100.433	0.000884762	0.000324725	0	0
59	bromotrifluoromethane	75-63-8	105.486	0.000988093	0.000470072	0	0.000326621
60	fluorobenzene	462-06-6	129.111	-0.00170201	0.00240169	0	4.33549e-05
61	iodobenzene	591-50-4	154.01	-0.000655877	0.00262994	0	0
62	bromobenzene	108-86-1	145.739	-0.00108693	0.00251414	0	0
63	trimethylamine	75-50-3	111.197	-0.00251358	0.00172205	0.0291286	0
64	N,N-dimethylformamide	68-12-2	116.036	-0.00160797	0.00459521	0.0810592	0
65	propylene glycol	57-55-6	115.892	-0.00187439	0.00555478	0.0712373	0.0331104
66	dibromomethane	74-95-3	108.941	0.000896289	0.00253933	0	0.0157077
67	1,2-dibromoethane	106-93-4	127.874	0.00246349	0.0029515	0	0.00207578
